# Supplementary material for: Reduced expression of α-L-Fucosidase-1 (FUCA-1) predicts recurrence and shorter cancer specific survival in luminal B LN+ breast cancer patients
Source: Oncotarget. 2018 Feb 7;9(20):15228–38. doi: 10.18632/oncotarget.24445 (PMC5880599; doi:10.18632/oncotarget.24445)
Supplement: Supplementary file 1 [file oncotarget-09-15228-s001.pdf]

## Reduced expression of $\alpha$ -L-Fucosidase-1 (FUCA-1) predicts recurrence and shorter cancer specific survival in luminal B LN+ breast cancer patients

### SUPPLEMENTARY MATERIALS

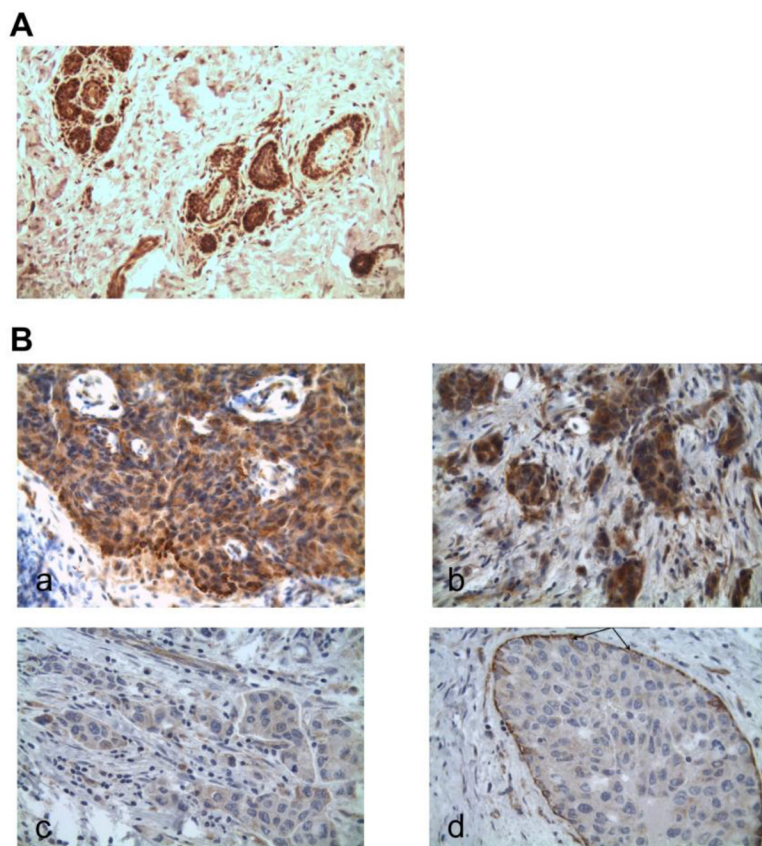

**Supplementary Figure 1:** Immunohistochemical staining for FUCA-1 of an archival section from a normal atrophic mammary gland (A), from a well differentiated breast cancer (B a), from a breast cancer having an intermediate degree of differentiation (B b), from a poorly differentiated breast cancer (B c) and from an intraductal breast carcinoma (B d). Magnification 10 $\times$ . The arrows point to the staining of myoepithelial cells.

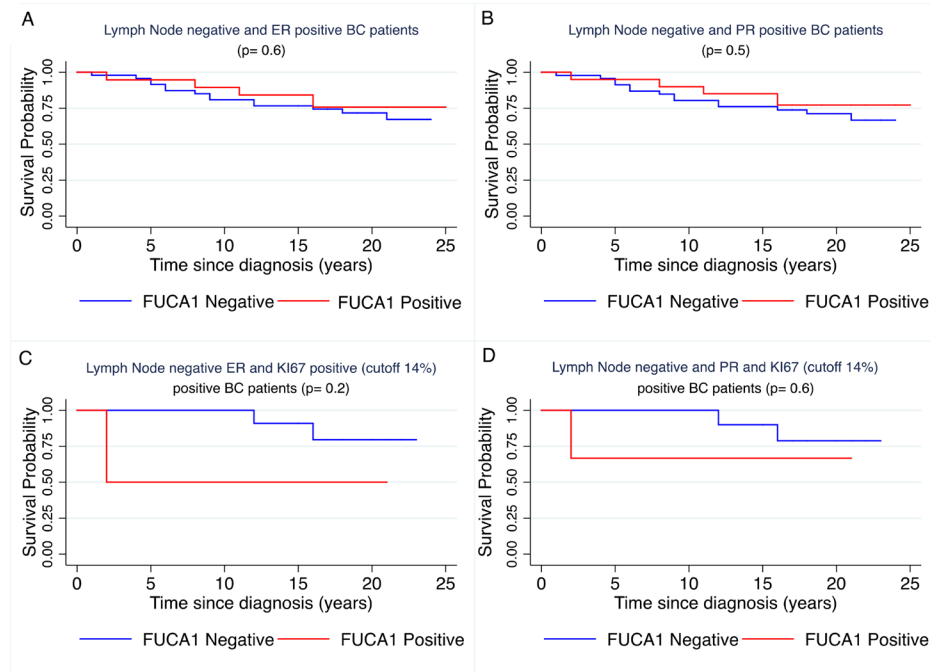

**Supplementary Figure 2:** Kaplan-Meier curves of cancer specific survival by positivity or negativity to FUCA-1 immunostaining in LN- ER+ patients (A), in LN-, PR+ patients (B), in LN-, ER+ patients with Ki67 staining higher than 14% (C) and in LN-, PR+ patients with Ki67 staining higher than 14% (D).

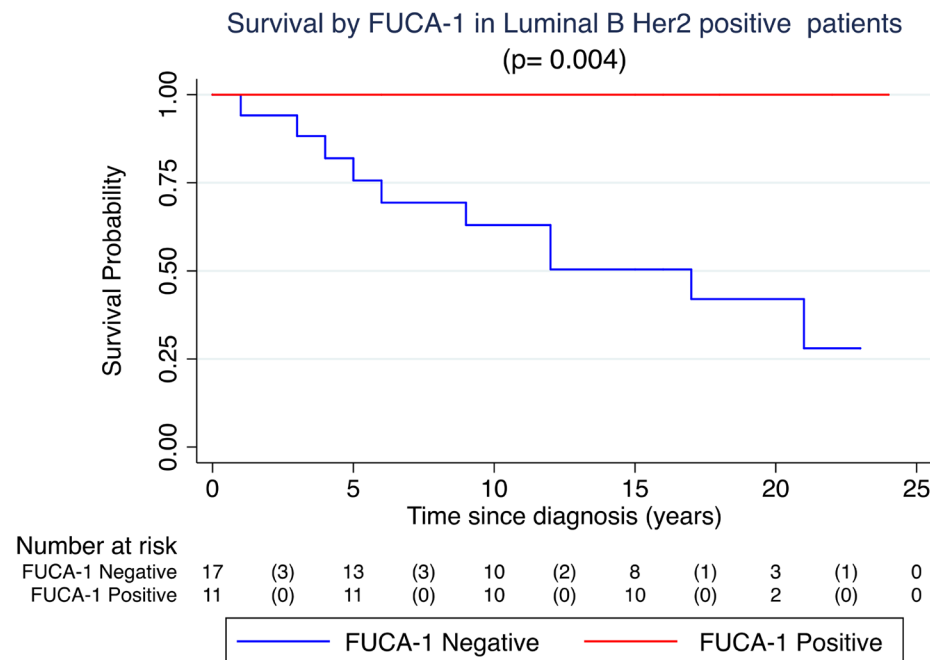

**Supplementary Figure 3:** Kaplan-Meier curves of cancer specific survival by positivity or negativity to FUCA-1 immunohistochemical staining in Luminal B HER2+ patients. In life table are reported at risk patients and in brackets the breast cancer specific deaths for the specific time interval.

**Supplementary Table 1: Clinical and pathological characteristics of the breast cancer patients who were successfully investigate for FUCA-1**

| Factors                             | Total case-study<br>204 (100%) | LN-<br>83 (41%) | LN+<br>121 (59%) |
|-------------------------------------|--------------------------------|-----------------|------------------|
| <b>Age, years</b>                   |                                |                 |                  |
| ≤35                                 | 14 (6.9%)                      | 1 (2.6%)        | 13 (10.7%)       |
| >35                                 | 190 (93.1%)                    | 82 (97.4%)      | 108 (89.3%)      |
| <b>Mean Age , years<br/>(range)</b> | 47.2<br>(26-55)                | 46.9<br>(32-55) | 47.4<br>(26-55)  |
| <b>Histology</b>                    |                                |                 |                  |
| Ductal                              | 167 (81.9%)                    | 61 (73.5%)      | 106 (87.6%)      |
| Lobular                             | 18 (8.8%)                      | 7 (8.4%)        | 11 (9.1%)        |
| Medullary                           | 5 (2.5%)                       | 5 (6.0%)        | -                |
| Mucinous                            | 7 (3.4%)                       | 4 (4.8%)        | 3 (2.5%)         |
| Tubular                             | 7 (3.4%)                       | 6 (7.2%)        | 1 (0.8%)         |
| <b>Grade</b>                        |                                |                 |                  |
| 1                                   | 24 (11.7%)                     | 19 (22.9%)      | 5 (4.1%)         |
| 2                                   | 92 (45.1%)                     | 44 (53%)        | 48 (39.7%)       |
| 3                                   | 88 (43.1%)                     | 20 (24.1%)      | 68 (56.2%)       |
| <b>Tumor size, cm</b>               |                                |                 |                  |
| ≤2                                  | 116 (57.1%)                    | 60 (72.3%)      | 56 (46.7%)       |
| 2–5                                 | 77 (37.9%)                     | 22 (2.5%)       | 55 (45.8%)       |
| ≥5                                  | 10 (4.9%)                      | 1 (1.2%)        | 9 (7.5%)         |
| <b>Lymph nodes</b>                  |                                |                 |                  |
| 1–3 lymph nodes                     | 77 (37.7%)                     | -               | 77 (63.6%)       |
| ≥4 lymph nodes                      | 43 (21%)                       | -               | 43 (35.5%)       |
| Unknown                             | 1 (0.8%)                       | -               | 1 (0.8%)         |
| <b>Stage</b>                        |                                |                 |                  |
| I                                   | 59 (29%)                       | 59 (71.1%)      | -                |
| II                                  | 90 (44%)                       | 23 (27.7%)      | 67 (55.4%)       |
| III                                 | 54 (26.5%)                     | 1 (1.2%)        | 53 (43.8%)       |
| Unknown                             | 1 (0.5%)                       | -               | 1 (0.8%)         |
| <b>Recurrence</b>                   |                                |                 |                  |
| No                                  | 88 (43.1%)                     | 48 (57.8%)      | 40 (33.1%)       |
| Yes                                 | 105 (51.5%)                    | 32 (38.6%)      | 73 (60.3%)       |
| Unknown                             | 11 (5.4%)                      | 3 (3.6%)        | 8 (6.6%)         |
| <b>ER</b>                           |                                |                 |                  |
| Negative                            | 46 (22.6%)                     | 17 (20.5%)      | 29 (24. %)       |
| Positive                            | 158 (77.4%)                    | 66 (79.5%)      | 92 (76%)         |
| <b>PR</b>                           |                                |                 |                  |
| Negative                            | 59 (28.9%)                     | 17 (20.5%)      | 42 (34.7%)       |
| Positive                            | 145 (71.1%)                    | 66 (79.5%)      | 79 (65.3%)       |
| <b>Her-2</b>                        |                                |                 |                  |
| Negative                            | 156 (76.2%)                    | 74 (89.2%)      | 82 (67.8%)       |
| Positive                            | 48 (23.5%)                     | 9 (10.8%)       | 39 (32.2%)       |
| <b>Ki67</b>                         |                                |                 |                  |
| <14%                                | 95 (46.6%)                     | 54 (65.1%)      | 41 (33.9%)       |
| ≥14%                                | 109 (53.4%)                    | 29 (34.9%)      | 80 (66.1%)       |
| <b>Molecular Subtypes</b>           |                                |                 |                  |
| Luminal A                           | 83 (40.7%)                     | 51 (61.5%)      | 32 (26.5%)       |
| Luminal B                           | 75 (36.8%)                     | 15 (18.1%)      | 60 (49.6%)       |
| Her2 non Luminal                    | 20 (9.8%)                      | 5 (6%)          | 15 (12.4%)       |
| TN                                  | 24 (11.8%)                     | 11 (13.2%)      | 13 (10.7%)       |
| Unknown                             | 2 (1%)                         | 1 (1.2%)        | 1 (0.8%)         |

**Supplementary Table 2: Protective effect of FUCA-1 expression in LN+ luminal B patients using the covariates of stage, grade, age at diagnosis and histological type of tumor**

| Variable_            | Haz. Ratio | Standard Err. | <i>P</i> > <i>z</i> | 95% Conf. Interval |
|----------------------|------------|---------------|---------------------|--------------------|
| Stage                | .9356486   | .3536163      | 0.860               | .446–1.96          |
| Grade                | 1.142308   | .3761113      | 0.686               | .599–2.18          |
| Age at diagnosis     | .992387    | .0274734      | 0.783               | .940–1.05          |
| Histologic type      | .9495623   | .3470957      | 0.887               | .464–1.94          |
| FUCA-1 cytoplasmatic | .2513416   | .1302586      | 0.008               | 0.091–0.694        |

General result of regression:  $p = 0.04$ .

**Supplementary Table 3: Effect of ER, PR, Ki67 on survival with respect to cytoplasmic expression of FUCA-1 in LN+ BC patients**

| Variables          |    |    |      | <i>p</i> value |
|--------------------|----|----|------|----------------|
| Ki67 (cut-off 14%) | ER | PR | HER2 |                |
| x                  |    |    |      | 0.14           |
|                    | x  |    |      | 0.03           |
|                    |    | x  |      | 0.02           |
| x                  | x  |    |      | 0.001          |
| x                  |    | x  |      | 0.0009         |
|                    |    |    | x    | 0.04           |
| x                  |    |    | x    | 0.09           |
|                    | x  |    | x    | 0.005          |
|                    |    | x  | x    | 0.009          |

*p* values refer to log-rank test obtained for cytoplasmic expression of FUCA-1 in LN+ BC patients positive for the marked biomarkers. For example, the *p* value of 0.14 refers to log-rank test calculated for cytoplasmic expression of FUCA-1 in LN+, Ki67+ (cut-off 14%) BC patients, *p* value of 0.03 refers to log-rank test calculated for cytoplasmic expression of FUCA-1 in LN+, ER+ BC patients, *p* = 0.02 is related to log-rank test calculated for cytoplasmic expression of FUCA-1 in LN+, PR+ BC cancer patients; *p* = 0.01 refers to log-rank test calculated for cytoplasmic expression of FUCA-1 in LN+, Ki67+ (cut-off 14%) and ER+ BC patients.

**Supplementary Table 4: Data from oncomine [1]**

| Cancer type                      | Cell line  | FUCA-1 Log2 median-centered intensity |
|----------------------------------|------------|---------------------------------------|
| Breast carcinoma                 | DU-4475    | 7,871                                 |
| Breast carcinoma                 | EVSA-T     | 4,754                                 |
| Breast carcinoma                 | MDA-MB-453 | 4,148                                 |
| Metablastic breast carcinoma     | HCC1569    | 4,806                                 |
| Breast adenocarcinoma            | CAL-85-1   | 7,055                                 |
| Breast adenocarcinoma            | CAL-51     | 6,656                                 |
| Breast adenocarcinoma            | AU565      | 6,388                                 |
| Breast adenocarcinoma            | EFM-192A   | 5,845                                 |
| Breast adenocarcinoma            | MDA-MB-361 | 4,528                                 |
| Breast adenocarcinoma            | CAL-120    | 4,281                                 |
| Ductal breast carcinoma          | KPL-1      | 5,722                                 |
| Ductal breast carcinoma          | ZR-75-1    | 5,591                                 |
| Ductal breast carcinoma          | JIMT-1     | 3,187                                 |
| Ductal breast carcinoma          | HCC1428    | 1,361                                 |
| Invasive ductal breast carcinoma | HCC1419    | 7,472                                 |
| Invasive ductal breast carcinoma | CAL-148    | 5,949                                 |
| Invasive ductal breast carcinoma | HCC2218    | 5,340                                 |
| Invasive ductal breast carcinoma | HCC1937    | 4,997                                 |
| Invasive ductal breast carcinoma | HCC1954    | 4,885                                 |
| Invasive ductal breast carcinoma | BT-549     | 4,589                                 |
| Invasive ductal breast carcinoma | HCC11433   | 3,734                                 |

**Supplementary Table 5: Sequence of primers and cycling conditions used for q-RT-PCR experiments**

| Gene    | Primers sequences                              | Cycling conditions                                                                             |
|---------|------------------------------------------------|------------------------------------------------------------------------------------------------|
| β-Actin | Fw primer:                                     | PCR: 2 steps:<br>Denaturation 95° C, 10 min<br>40×: 95° C/15 sec; 60° C/1 min                  |
|         | 5'-GTGGATCAGCAAGCAGGAGT-3'                     |                                                                                                |
|         | Rev primer:                                    |                                                                                                |
|         | 5'-AGGGTGTAACGCAACTAAGTCA-3'                   |                                                                                                |
| FUCA-1  | Probe (M                                       | PCR: 3 steps:<br>Denaturation 95° C, 2 min<br>45×: 95° C/15 sec; 56° C/30 sec;<br>72° C/30 sec |
|         | 5'-/FAM/CAC CGC AAA TGC TTC-3'                 |                                                                                                |
|         | Fw primer:                                     |                                                                                                |
|         | 5'-ATG GAC TGA TTG TTC CCA TCT T-3'            |                                                                                                |
|         | Rev primer:                                    |                                                                                                |
|         | 5'-CCA TGG TTT GGA GGC ATA GA-3'               |                                                                                                |
|         | Probe:                                         |                                                                                                |
|         | 5'-FAM/AGC CAT TTC /ZEN/CCA ACA GCA AGA AGC-3' |                                                                                                |

## REFERENCE

1. Adai A. Breast cancer cell lines. Genentech, not published, <https://www.ncbi.nlm.nih.gov/>.
